# Supplementary material
Source: bioRxiv or medRxiv preprint supplement (https://medrxiv.org/highwire/filestream/83993/field_highwire_adjunct_files/0/2020.05.27.20115238-1.pdf)
Supplement: Supplementary file [file 2020.05.27.20115238-1.pdf]

SUPPLEMENTARY TABLE 1: ALL TRIALS REVIEWED. SUPPLEMENTARY TABLE 1: TRIALS REVIEWED. All interventions reviewed are listed with the registration number in the listing database, the country of origin, the severity of illness, the clinical setting whether hospital or outpatient, they type of intervention, the number of patients projected, and the category of the intervention. CGRP: Calcitonin gene related peptide CHIMED: Traditional Chinese medication; IFN: Interferons ;LPV: Lopanovir/ritanovir; RAS: Renin angiotensin system

| CLINICAL TRIAL REGISTRATION           | COUNTRY        | SEVERITY    | SETTING              | INTERVENTION                                               | NO SUBJECTS | CLASS OF AGENT         |
|---------------------------------------|----------------|-------------|----------------------|------------------------------------------------------------|-------------|------------------------|
| NCT04355962                           | Switzerland    | NA          | ICU                  | Sevoflurane                                                | 64          | ANESTHESIA             |
| <a href="#">NCT04348370</a>           | United States  | Non-severe  | Healthcare Workers   | BCG Vaccine                                                | 1800        | ANGIOGENESIS INHIBITOR |
| NCT04305106                           | China          | Severe      | Hospital             | Bevacizumab                                                | 140         | ANGIOGENESIS INHIBITOR |
| NCT04275414                           | China          | Severe      | Hospital             | Bevacizumab                                                | 20          | ANGIOGENESIS INHIBITOR |
| IR/46977                              | Iran           | NA          | Outpatient           | Minocycline                                                | 40          | ANTIBIOTIC             |
| <a href="#">NCT04369365</a>           | Austria        | NA          | Outpatient           | AZT                                                        | 200         | ANTIBIOTIC             |
| EU/2020-001640-26/GB/                 | United Kingdom | NA          | ICU                  | Actilyse                                                   | 24          | ANTICOAG               |
| <a href="#">NCT04365309</a>           | China          | NA          | Unclear              | Aspirin                                                    | 128         | ANTICOAG               |
| <a href="#">NCT04348383</a>           | Spain          | Severe      | Hospital             | Defibrotide                                                | 120         | ANTICOAG               |
| <a href="#">NCT04359277</a>           | United States  | NA          | Hospital             | Enoxaparin                                                 | 1000        | ANTICOAG               |
| <a href="#">NCT04345848</a>           | Switzerland    | NA          | Hospital, ICU        | Enoxaparin                                                 | 200         | ANTICOAG               |
| <a href="#">CHI51265</a>              | China          | NA          | Hospital             | LMW Heparin                                                | 120         | ANTICOAG               |
| NCT04368377                           | Italy          | NA          | ICU                  | Tirofiban, Clopidogrel, Acetylsalicylic acid, Fondaparinux | 5           | ANTICOAG               |
| CHI50474                              | China          | Unspecified | Unclear              | Celecoxib                                                  | 60          | ANTIINFLAMMATORY       |
| NCT04308317                           | China          | Mixed       | Unclear              | Tetrandrine                                                | 60          | ANTIINFLAMMATORY       |
| CHI49738                              | China          | Mixed       | Outpatient, Hospital | Tranilast                                                  | 60          | ANTIINFLAMMATORY       |
| NCT04339426                           | United States  | NA          | Unclear              | Atovaquorine, AZT                                          | 25          | ANTIMALARIAL           |
| IR/47099                              | Iran           | NA          | Hospital             | Chloroquine + Azithromycin + Melatonin                     | 82          | ANTIMALARIAL           |
| <a href="#">NCT04333914</a>           | France         | NA          | Hospital             | Chloroquine analog, nivolumab, TCZ                         | 273         | ANTIMALARIAL           |
| NCT04321278                           | Brazil         | Severe      | Hospital             | Azithromycin , HCQ                                         | 440         | ANTIMALARIAL           |
| NCT04324463                           | Canada         | NA          | Outpatient, Hospital | Azithromycin , HCQ                                         | 1500        | ANTIMALARIAL           |
| NCT04322396                           | Denmark        | NA          | Hospital             | Azithromycin , HCQ                                         | 226         | ANTIMALARIAL           |
| <a href="#">EU/2020-001469-35/PL/</a> | Poland         | NA          | Outpatient           | Chlorine phosphate (Arechin)                               | 400         | ANTIMALARIAL           |
| NCT04347980                           | France         | Severe      | Hospital             | Dexamethasone, HCQ                                         | 122         | ANTIMALARIAL           |
| NCT04351191                           | Pakistan       | Non-severe  | Outpatient           | HCQ                                                        | 400         | ANTIMALARIAL           |
| NCT04351516                           | Germany        | Mixed       | Outpatient           | HCQ                                                        | 350         | ANTIMALARIAL           |
| NCT04346667                           | Pakistan       | NA          | Outpatient           | HCQ                                                        | 400         | ANTIMALARIAL           |
| NCT04362332                           | Netherlands    | NA          | Hospital             | HCQ                                                        | 950         | ANTIMALARIAL           |
| NCT04353037                           | United States  | NA          | Healthcare Workers,  | HCQ                                                        | 850         | ANTIMALARIAL           |

|                             |                |            |                                                    |     |      |              |
|-----------------------------|----------------|------------|----------------------------------------------------|-----|------|--------------|
| NCT04354870                 | United States  | NA         | Outpatient<br>Healthcare Workers                   | HCQ | 350  | ANTIMALARIAL |
| NCT04349371                 | United States  | Non-severe | Healthcare Workers                                 | HCQ | 350  | ANTIMALARIAL |
| IR/47090                    | Iran           | NA         | Healthy Exposed                                    | HCQ | 1000 | ANTIMALARIAL |
| CHI49420                    | China          | NA         | Unclear                                            | HCQ | 300  | ANTIMALARIAL |
| NCT04341441                 | United States  | NA         | Healthcare Workers                                 | HCQ | 3000 | ANTIMALARIAL |
| NCT04308668                 | United States  | Mixed      | Healthy Exposed, Healthcare<br>Workers, Outpatient | HCQ | 3000 | ANTIMALARIAL |
| NCT04329923                 | United States  | Mixed      | Healthcare Workers,<br>Outpatient, Hospital        | HCQ | 400  | ANTIMALARIAL |
| NCT04333654                 | United States  | Non-severe | Outpatient                                         | HCQ | 210  | ANTIMALARIAL |
| NCT04329611                 | Canada         | NA         | Outpatient                                         | HCQ | 1660 | ANTIMALARIAL |
| <a href="#">NCT04328493</a> | Vietnam        | NA         | Hospital                                           | HCQ | 250  | ANTIMALARIAL |
| <a href="#">NCT04328961</a> | United States  | None       | Healthy Exposed                                    | HCQ | 2000 | ANTIMALARIAL |
| NCT04342169                 | United States  | Non-severe | Outpatient                                         | HCQ | 400  | ANTIMALARIAL |
| NCT04323527                 | Brazil         | NA         | Hospital                                           | HCQ | 440  | ANTIMALARIAL |
| NCT04345692                 | United States  | NA         | Hospital                                           | HCQ | 350  | ANTIMALARIAL |
| NCT04342650                 | Brazil         | NA         | Unclear                                            | HCQ | 210  | ANTIMALARIAL |
| NCT04333225                 | United States  | None       | Healthcare Workers                                 | HCQ | 360  | ANTIMALARIAL |
| <a href="#">NCT04342221</a> | Germany        | NA         | Hospital                                           | HCQ | 220  | ANTIMALARIAL |
| NCT04328467                 | United States  | NA         | Healthcare Workers                                 | HCQ | 3500 | ANTIMALARIAL |
| NCT04334382                 | United States  | Non-severe | Outpatient                                         | HCQ | 1550 | ANTIMALARIAL |
| NCT04331834                 | Spain          | None       | Healthcare Workers                                 | HCQ | 440  | ANTIMALARIAL |
| CHI49524                    | China          | Mixed      | Unclear                                            | HCQ | 360  | ANTIMALARIAL |
| CHI49482                    | China          | Severe     | Hospital                                           | HCQ | 100  | ANTIMALARIAL |
| CHI49536                    | China          | Non-severe | Outpatient                                         | HCQ | 100  | ANTIMALARIAL |
| <a href="#">CHI49607</a>    | China          | NA         | Unclear                                            | HCQ | 100  | ANTIMALARIAL |
| CHI48880                    | China          | NA         | Unclear                                            | HCQ | 300  | ANTIMALARIAL |
| EU/2020-001270-29/DK/       | Denmark        | Mixed      | Hospital                                           | HCQ | 350  | ANTIMALARIAL |
| NCT04318444                 | United States  | None       | Healthy Exposed                                    | HCQ | 1600 | ANTIMALARIAL |
| NCT04315896                 | Mexico         | Severe     | Hospital                                           | HCQ | 500  | ANTIMALARIAL |
| NCT04318015                 | Mexico         | None       | Healthcare Workers                                 | HCQ | 400  | ANTIMALARIAL |
| NCT04316377                 | Norway         | Mixed      | Hospital                                           | HCQ | 202  | ANTIMALARIAL |
| ISRCTNISRCTN86534580        | United Kingdom | NA         | Outpatient                                         | HCQ | 3000 | ANTIMALARIAL |
| IR/46932                    | Iran           | NA         | Healthy Exposed, Healthcare<br>Workers             | HCQ | 500  | ANTIMALARIAL |
| <a href="#">NCT04369742</a> | United States  | NA         | Hospital                                           | HCQ | 626  | ANTIMALARIAL |
| <a href="#">NCT04363450</a> | United States  | NA         | Healthcare Workers                                 | HCQ | 1700 | ANTIMALARIAL |
| NCT04332991                 | United States  | Severe     | Hospital                                           | HCQ | 510  | ANTIMALARIAL |

|                             |               |            |                      |                                            |      |              |
|-----------------------------|---------------|------------|----------------------|--------------------------------------------|------|--------------|
| <a href="#">NCT04334967</a> | United States | Non-severe | Outpatient           | HCQ                                        | 1250 | ANTIMALARIAL |
| NCT04351620                 | United States | Non-severe | Outpatient           | HCQ                                        | 20   | ANTIMALARIAL |
| NCT04345653                 | United States | Non-severe | Healthcare Workers   | HCQ                                        | 45   | ANTIMALARIAL |
| CHI50843                    | China         | NA         | Hospital             | HCQ                                        | 80   | ANTIMALARIAL |
| CHI49317                    | China         | NA         | Unclear              | HCQ                                        | 78   | ANTIMALARIAL |
| CHI49218                    | China         | Severe     | Hospital             | HCQ                                        | 80   | ANTIMALARIAL |
| CHI49612                    | China         | NA         | Unclear              | HCQ                                        | 100  | ANTIMALARIAL |
| CHI48968                    | China         | NA         | Hospital             | HCQ                                        | 20   | ANTIMALARIAL |
| NCT04261517                 | China         | NA         | Unclear              | HCQ                                        | 30   | ANTIMALARIAL |
| IR/46946                    | Iran          | NA         | Healthy Unexposed    | HCQ                                        | 60   | ANTIMALARIAL |
| NCT04322123                 | Brazil        | NA         | Hospital, ICU        | HCQ , Azithromycin                         | 630  | ANTIMALARIAL |
| IR/46536                    | Iran          | NA         | Hospital             | HCQ , LPV/R , Oseltamivir                  | 50   | ANTIMALARIAL |
| JPJRCTS031190227            | Japan         | NA         | Hospital             | HCQ , LPV/R , Oseltamivir                  | 50   | ANTIMALARIAL |
| IR/47200                    | Iran          | Moderate   | Hospital             | HCQ, Arbidol                               | 40   | ANTIMALARIAL |
| NCT04336332                 | United States | Non-severe | Outpatient, Hospital | HCQ, azithromycin                          | 160  | ANTIMALARIAL |
| NCT04335552                 | United States | Mixed      | Hospital             | HCQ, azithromycin                          | 500  | ANTIMALARIAL |
| NCT04344379                 | France        | Non-severe | Healthcare Workers   | HCQ, azithromycin                          | 900  | ANTIMALARIAL |
| NCT04329832                 | United States | NA         | Hospital             | HCQ, Azithromycin                          | 300  | ANTIMALARIAL |
| NCT04345861                 | France        | NA         | Hospital             | HCQ, AZT                                   | 150  | ANTIMALARIAL |
| NCT04354428                 | United States | NA         | Outpatient           | HCQ, AZT                                   | 630  | ANTIMALARIAL |
| NCT04344444                 | United States | NA         | Hospital             | HCQ, Azt                                   | 600  | ANTIMALARIAL |
| NCT04341727                 | United States | NA         | Hospital             | HCQ, AZT                                   | 500  | ANTIMALARIAL |
| EU/2020-001527-14/NL/       | Netherlands   | NA         | Hospital             | HCQ, AZT                                   | 60   | ANTIMALARIAL |
| IR/46968                    | Iran          | NA         | Hospital             | HCQ, AZT, Naproxen, LPV/r, Corticosteroids | 906  | ANTIMALARIAL |
| NCT04341870                 | France        | NA         | Hospital             | HCQ, AZT, Sarilumab                        | 60   | ANTIMALARIAL |
| <a href="#">NCT04370262</a> | United States | NA         | Hospital             | HCQ, Famotidine                            | 1170 | ANTIMALARIAL |
| NCT04344457                 | United States | Non-severe | Outpatient           | HCQ, Indomethacin, azithromycin            | 80   | ANTIMALARIAL |
| NCT04344457                 | United States | Non-severe | Outpatient           | HCQ, Indomethacin, azithromycin            | 80   | ANTIMALARIAL |
| NCT04343092                 | Iraq          | Mixed      | Hospital             | HCQ, Ivermectin                            | 50   | ANTIMALARIAL |
| IR/46926                    | Iran          | NA         | Outpatient           | HCQ, LPV/r                                 | 60   | ANTIMALARIAL |
| <a href="#">IR/47022</a>    | Iran          | NA         | Hospital             | HCQ, LPV/r                                 | 100  | ANTIMALARIAL |
| NCT04328285                 | France        | NA         | Healthcare Workers   | HCQ, LPV/r,                                | 1200 | ANTIMALARIAL |
| IR/46561                    | Iran          | Severe     | Hospital             | HCQ, LPV/r,                                | 20   | ANTIMALARIAL |
| IR/46814                    | Iran          | NA         | Hospital             | HCQ, LPV/r, Atazanavir/r, Teicoplanin      | 40   | ANTIMALARIAL |
| NCT04343768                 | Iran          | Mixed      | Hospital             | HCQ, LPV/r, IFN                            | 60   | ANTIMALARIAL |
| IR/46790                    | Iran          | NA         | Hospital             | HCQ, LPV/r, Sofosbuvir-Velpatasvir         | 80   | ANTIMALARIAL |

|                             |                |            |                      |                              |      |                                    |
|-----------------------------|----------------|------------|----------------------|------------------------------|------|------------------------------------|
| IR/47119                    | Iran           | NA         | Hospital             | HCQ, Thalidomide             | 60   | ANTIMALARIAL                       |
| <a href="#">NCT04325893</a> | France         | NA         | Unclear              | HCQ/placebo                  | 1300 | ANTIMALARIAL                       |
| ISRCTNISRCTN14326006        | Canada         | NA         | Healthcare Workers   | Hydroxychloroquine           | 988  | ANTIMALARIAL                       |
| IR/46940                    | Iran           | NA         | Unclear              | LPV/r, HCQ, Herbal medicine  | 40   | ANTIMALARIAL                       |
| NCT04328012                 | United States  | NA         | Hospital             | LPV/r, HCQ, losartan         | 4000 | ANTIMALARIAL                       |
| ISRCTNISRCTN50189673        | United Kingdom | Mixed      | Hospital             | LPV/r, IFN, HCQ, steroids    | 5000 | ANTIMALARIAL                       |
| NCT04332094                 | Spain          | Non-severe | Hospital             | HCQ , TCZ, azithromycin      | 276  | ANTIMALARIAL PLUS IMMUNE MODULATOR |
| IR/46887                    | Iran           | Mixed      | Unclear              | Levamisole                   | 50   | ANTIPARASITIC                      |
| NCT04348409                 | Brazil         | Mixed      | Hospital             | Nitazoxanide                 | 50   | ANTIPARASITIC                      |
| NCT04341493                 | Mexico         | NA         | Unclear              | Nitazoxanide                 | 86   | ANTIPARASITIC                      |
| IR/46576                    | Iran           | NA         | Outpatient, Hospital | Noscapine                    | 125  | ANTITUSSIVE                        |
| NCT04330638                 | Belgium        | Severe     | Hospital, ICU        | Anakinra, siltuximab, TCZ    | 342  | ANTIVIRAL                          |
| NCT04339712                 | Greece         | Severe     | Unclear              | Anakinra, TCZ                | 40   | ANTIVIRAL                          |
| NCT04324489                 | China          | Severe     | Hospital             | Antiviral                    | 4    | ANTIVIRAL                          |
| IR/47087                    | Iran           | NA         | Hospital             | Arbidol                      | 200  | ANTIVIRAL                          |
| <a href="#">CHI49165</a>    | China          | Non-severe | Outpatient           | Arbidol                      | 380  | ANTIVIRAL                          |
| CHI49532                    | China          | NA         | Hospital             | Azvodine                     | 20   | ANTIVIRAL                          |
| CHI50507                    | China          | Mixed      | Unclear              | Azvodine                     | 10   | ANTIVIRAL                          |
| NCT04358614                 | Italy          | NA         | Hospital             | Baricitinib                  | 12   | ANTIVIRAL                          |
| <a href="#">NCT04321096</a> | Denmark        | NA         | Hospital             | Camostat                     | 580  | ANTIVIRAL                          |
| IR/46573                    | Iran           | Mixed      | Hospital             | Camostat                     | 40   | ANTIVIRAL                          |
| NCT04276688                 | China          | NA         | Hospital             | Combination Antiviral        | 127  | ANTIVIRAL                          |
| NCT04291729                 | China          | NA         | Hospital             | Combination Antiviral        | 11   | ANTIVIRAL                          |
| <a href="#">NCT04255017</a> | China          | NA         | Unclear              | Combination Antiviral        | 400  | ANTIVIRAL                          |
| CHI50136                    | China          | NA         | Unclear              | Combination Antiviral        | 30   | ANTIVIRAL                          |
| NCT04261270                 | China          | Mixed      | Hospital             | Combination Antiviral        | 60   | ANTIVIRAL                          |
| CHI49918                    | China          | Mixed      | Hospital             | Danoprevir , Ritonavir       | 60   | ANTIVIRAL                          |
| NCT04345276                 | China          | NA         | Hospital             | Danoprevir, Ritonavir        | 40   | ANTIVIRAL                          |
| NCT04252274                 | China          | NA         | Unclear              | Darunavir And Cobicistat     | 30   | ANTIVIRAL                          |
| <a href="#">NCT04304053</a> | Spain          | Non-severe | Outpatient           | Darunavir/Cobicistat , HCQ   | 3040 | ANTIVIRAL                          |
| <a href="#">CHI49790</a>    | China          | Mixed      | Unclear              | Ebastine                     | 100  | ANTIVIRAL                          |
| NCT04334928                 | Spain          | Non-severe | Healthcare Workers   | Emtricitabine/tenofovir, HCQ | 4000 | ANTIVIRAL                          |
| NCT04333589                 | China          | NA         | Unclear              | Favipiravir                  | 210  | ANTIVIRAL                          |
| NCT04358549                 | United States  | NA         | Hospital             | Favipiravir                  | 50   | ANTIVIRAL                          |
| CHI49988                    | China          | NA         | Unclear              | Favipiravir                  | 30   | ANTIVIRAL                          |
| CHI49510                    | China          | NA         | Hospital             | Favipiravir                  | 60   | ANTIVIRAL                          |

|                                       |               |            |                     |                                                  |      |                              |
|---------------------------------------|---------------|------------|---------------------|--------------------------------------------------|------|------------------------------|
| <a href="#">JPJRCT031190226</a>       | Japan         | NA         | Hospital            | Favipiravir                                      | 50   | ANTIVIRAL                    |
| JPJRCT041190120                       | Japan         | NA         | Outpatient          | Favipiravir                                      | 86   | ANTIVIRAL                    |
| NCT04310228                           | China         | NA         | Unclear             | Favipiravir , TCZ                                | 150  | ANTIVIRAL                    |
| CHI50137                              | China         | NA         | Hospital            | Favipiravir Vs. Arbidol                          | 240  | ANTIVIRAL                    |
| IR/46942                              | Iran          | NA         | Hospital            | Favipiravir, LPV/r                               | 84   | ANTIVIRAL                    |
| CHI51126                              | China         | NA         | Hospital            | Favipiravir, TCZ                                 | 150  | ANTIVIRAL                    |
| CHI49042                              | China         | NA         | Outpatient          | Favirapir, LPV/r                                 | 90   | ANTIVIRAL                    |
| JapicCTI-205238                       | Japan         | Mixed      | Hospital            | FVP                                              | 96   | ANTIVIRAL                    |
| <a href="#">NCT04319900</a>           | China         | NA         | Unclear             | FVP, HCQ                                         | 150  | ANTIVIRAL                    |
| CHI51329                              | China         | NA         | Resolved Discharged | HCQ , /- Favipiravir                             | 150  | ANTIVIRAL                    |
| IR/46897                              | Iran          | NA         | Hospital            | HCQ, Arbidol, LPV/r                              | 100  | ANTIVIRAL                    |
| <a href="#">IR/47078</a>              | Iran          | NA         | Hospital            | HCQ, Atazanavir/r, Vitamin C                     | 110  | ANTIVIRAL                    |
| NCT04355052                           | Israel        | NA         | Hospital            | HCQ, AZT, Camostat mesilate                      | 250  | ANTIVIRAL                    |
| <a href="#">IR/46783</a>              | Iran          | NA         | Hospital            | HCQ, Favipiravir, LPV/r                          | 324  | ANTIVIRAL                    |
| CHI51141                              | China         | Non-severe | Outpatient          | Interferon, ribavirin, arbidol, ribavirin        | 30   | ANTIVIRAL                    |
| <a href="#">IR/47012</a>              | Iran          | Unclear    | Unclear             | Ivermectin                                       | 100  | ANTIVIRAL                    |
| CHI50251                              | China         | Mixed      | Unclear             | Ixekizumab , Antiviral                           | 40   | ANTIVIRAL                    |
| CHI51112                              | China         | NA         | Unclear             | Lopinavir/ritonavir                              | 90   | ANTIVIRAL                    |
| <a href="#">CHI48782</a>              | China         | Mixed      | Outpatient          | LPV/r , Interferon                               | 108  | ANTIVIRAL                    |
| NCT04252885                           | China         | NA         | Unclear             | LPV/r, Arbidol                                   | 125  | ANTIVIRAL                    |
| NCT04275245                           | China         | NA         | Unclear             | Mepaluzumab                                      | 20   | ANTIVIRAL                    |
| NCT04280705                           | United States | Severe     | Hospital            | Remdesivir                                       | 800  | ANTIVIRAL                    |
| NCT04292899                           | United States | Severe     | Hospital            | Remdesivir                                       | 6000 | ANTIVIRAL                    |
| NCT04292730                           | United States | Mixed      | Hospital            | Remdesivir                                       | 1600 | ANTIVIRAL                    |
| <a href="#">EU/2020-001052-18/ES/</a> | Denmark       | NA         | Hospital            | Remdesivir                                       | 440  | ANTIVIRAL                    |
| <a href="#">NCT04321616</a>           | Norway        | Severe     | Hospital, ICU       | Remdesivir, HCQ                                  | 700  | ANTIVIRAL                    |
| IR/46463                              | Iran          | Mixed      | Hospital            | Sofosbuvir                                       | 70   | ANTIVIRAL                    |
| IR/46784                              | Iran          | NA         | Hospital            | Sofosbuvir                                       | 60   | ANTIVIRAL                    |
| IR/46885                              | Iran          | NA         | Hospital            | Sofosbuvir + ribavirin                           | 48   | ANTIVIRAL                    |
| IR/46567                              | Iran          | NA         | Hospital            | Sofosbuvir/Lepidiasvir, HCQ , Oseltamivir, LPV/r | 50   | ANTIVIRAL                    |
| EU/2020-001244-26/AT/                 | Austria       | NA         | ICU                 | Solnatide                                        | 40   | ANTIVIRAL                    |
| <a href="#">CHI49723</a>              | China         | NA         | Hospital            | Triazavirin                                      | 240  | ANTIVIRAL                    |
| <a href="#">NCT04321993</a>           | Canada        | Mixed      | Hospital            | LPV/r, HCQ, Baricitinib, Sarilumab               | 1000 | ANTIVIRAL + IMMUNE MODULATOR |
| NCT04347031                           | Russia        | NA         | Hospital            | Melfoquine, HCQ, AZT, TCZ                        | 320  | ANTIVIRAL + IMMUNE MODULATOR |
| <a href="#">NCT04351763</a>           | Poland        | Mixed      | Hospital            | Amiodarone, Verapamil                            | 804  | CARDIOVASCULAR               |
| NCT04304313                           | China         | Mixed      | Unclear             | Sildenafil                                       | 10   | CARDIOVASCULAR               |

|                             |               |               |                     |                      |     |                 |
|-----------------------------|---------------|---------------|---------------------|----------------------|-----|-----------------|
| <a href="#">NCT04319731</a> | United States | NA            | Hospital            | Amniotic Fluid       | 10  | CELL THERAPY    |
| CHI51404                    | China         | NA            | Unclear             | Cell Product         | 20  | CELL THERAPY    |
| NCT04324996                 | China         | NA            | Unclear             | Engineered Cells     | 90  | CELL THERAPY    |
| IR/47264                    | Iran          | NA            | Hospital            | Natural Killer Cells | 70  | CELL THERAPY    |
| NCT04280224                 | China         | NA            | Unclear             | Natural-Killer Cells | 30  | CELL THERAPY    |
| NCT04361942                 | Spain         | NA            | ICU                 | Stem Cell            | 24  | CELL THERAPY    |
| NCT04339660                 | China         | NA            | Unclear             | Stem Cell            | 30  | CELL THERAPY    |
| IR/47156                    | Iran          | Mild/moderate | Unclear             | Stem Cell Therapy    | 20  | CELL THERAPY    |
| NCT04349631                 | United States | Non-severe    | Healthcare Workers  | Stem Cells           | 56  | CELL THERAPY    |
| NCT04355728                 | United States | NA            | Hospital, ICU       | Stem Cells           | 24  | CELL THERAPY    |
| IR/47110                    | Iran          | NA            | ICU                 | Stem Cells           | 10  | CELL THERAPY    |
| NCT04333368                 | France        | Severe        | ICU                 | Stem Cells           | 60  | CELL THERAPY    |
| NCT04336254                 | China         | Severe        | Hospital            | Stem Cells           | 20  | CELL THERAPY    |
| NCT04331613                 | China         | Severe        | ICU                 | Stem Cells           | 9   | CELL THERAPY    |
| CHI51904                    | China         | Severe        | Unclear             | Stem Cells           | 36  | CELL THERAPY    |
| CHI51050                    | China         | Severe        | Hospital            | Stem Cells           | 20  | CELL THERAPY    |
| CHI49812                    | China         | NA            | Unclear             | Stem Cells           | 20  | CELL THERAPY    |
| CHI49901                    | China         | Severe        | Hospital            | Stem Cells           | 16  | CELL THERAPY    |
| CHI41760                    | China         | Severe        | Hospital            | Stem Cells           | 30  | CELL THERAPY    |
| CHI49146                    | China         | Severe        | Hospital            | Stem Cells           | 63  | CELL THERAPY    |
| NCT04252118                 | China         | NA            | Unclear             | Stem Cells           | 20  | CELL THERAPY    |
| NCT04288102                 | China         | Severe        | Hospital            | Stem Cells           | 90  | CELL THERAPY    |
| NCT04313322                 | Jordan        | NA            | Unclear             | Stem Cells           | 5   | CELL THERAPY    |
| NCT04269525                 | China         | Severe        | ICU                 | Stem Cells           | 10  | CELL THERAPY    |
| IR/46789                    | Iran          | NA            | Hospital            | Stem Cells           | 5   | CELL THERAPY    |
| IR/47030                    | Iran          | NA            | Hospital, ICU       | Stem Cells           | 6   | CELL THERAPY    |
| CHI49674                    | China         | Mixed         | Hospital            | Stem Cells           | 120 | CELL THERAPY    |
| NCT04348435                 | United States | Non-severe    | Healthcare Workers  | Stem Cells           | 100 | CELL THERAPY    |
| CHI49254                    | China         | Mixed         | Hospital            | Stem Cells           | 200 | CELL THERAPY    |
| NCT04367077                 | United States | NA            | Hospital            | Stem Cells           | 400 | CELL THERAPY    |
| <a href="#">NCT04346615</a> | United States | Mixed         | Hospital            | Vazegepant           | 120 | CGRP            |
| NCT04333550                 | Iran          | Mixed         | Hospital, Unclear   | Deferoxamine         | 50  | CHELATING AGENT |
| CHI49631                    | China         | Non-severe    | Unclear             | TCM Exercise         | 160 | CHIMED          |
| CHI51030                    | China         | NA            | Resolved Discharged | TCM Exercise         | 28  | CHIMED          |
| <a href="#">CHI49762</a>    | China         | Non-severe    | Unclear             | TCM Injectable       | 348 | CHIMED          |
| CHI49222                    | China         | NA            | Unclear             | TCM Injectable       | 238 | CHIMED          |

|             |       |             |                      |                              |      |        |
|-------------|-------|-------------|----------------------|------------------------------|------|--------|
| CHI49220    | China | Non-severe  | Outpatient           | TCM Injectable               | 160  | CHIMED |
| CHI50115    | China | Non-severe  | Unclear              | TCM Injectable               | 80   | CHIMED |
| CHI50306    | China | Severe      | Hospital             | TCM Injectable               | 60   | CHIMED |
| CHI49748    | China | NA          | Hospital             | TCM Injectable               | 50   | CHIMED |
| CHI49104    | China | NA          | Outpatient           | TCM Injectable               | 60   | CHIMED |
| CHI50586    | China | Mixed       | Unclear              | TCM Injectable               | 60   | CHIMED |
| CHI49297    | China | Mixed       | Outpatient, Hospital | TCM Injectable               | 90   | CHIMED |
| CHI50025    | China | Severe      | Unclear              | Traditional Chinese Medicine | 120  | CHIMED |
| CHI52699    | China | NA          | Unclear              | Traditional Chinese Medicine | 200  | CHIMED |
| CHI52477    | China | NA          | Unclear              | Traditional Chinese Medicine | 300  | CHIMED |
| CHI52414    | China | NA          | Healthy Exposed      | Traditional Chinese Medicine | 2000 | CHIMED |
| NCT04334265 | China | Unspecified | Unclear              | Traditional Chinese Medicine | 750  | CHIMED |
| CHI52106    | China | NA          | Unclear              | Traditional Chinese Medicine | 300  | CHIMED |
| CHI51100    | China | NA          | Outpatient, Hospital | Traditional Chinese Medicine | 2840 | CHIMED |
| CHI51240    | China | NA          | Resolved Discharged  | Traditional Chinese Medicine | 144  | CHIMED |
| CHI50202    | China | NA          | Unclear              | Traditional Chinese Medicine | 204  | CHIMED |
| CHI49647    | China | NA          | Unclear              | Traditional Chinese Medicine | 132  | CHIMED |
| CHI49543    | China | Non-severe  | Outpatient           | Traditional Chinese Medicine | 180  | CHIMED |
| CHI49348    | China | Mixed       | Resolved Discharged  | Traditional Chinese Medicine | 100  | CHIMED |
| CHI49408    | China | NA          | Hospital             | Traditional Chinese Medicine | 408  | CHIMED |
| CHI49453    | China | NA          | Unclear              | Traditional Chinese Medicine | 120  | CHIMED |
| CHI49287    | China | NA          | Unclear              | Traditional Chinese Medicine | 200  | CHIMED |
| CHI49380    | China | Severe      | Hospital             | Traditional Chinese Medicine | 160  | CHIMED |
| CHI48792    | China | NA          | Unclear              | Traditional Chinese Medicine | 200  | CHIMED |
| CHI48985    | China | NA          | Healthy Exposed      | Traditional Chinese Medicine | 600  | CHIMED |
| CHI48988    | China | NA          | Outpatient           | Traditional Chinese Medicine | 400  | CHIMED |
| CHI49080    | China | NA          | Unclear              | Traditional Chinese Medicine | 1000 | CHIMED |
| CHI51139    | China | NA          | Unclear              | Traditional Chinese Medicine | 400  | CHIMED |
| CHI49051    | China | NA          | Unclear              | Traditional Chinese Medicine | 400  | CHIMED |
| CHI48860    | China | Mixed       | Outpatient, Hospital | Traditional Chinese Medicine | 140  | CHIMED |
| CHI48824    | China | NA          | Unclear              | Traditional Chinese Medicine | 60   | CHIMED |
| CHI50082    | China | Mixed       | Hospital             | Traditional Chinese Medicine | 96   | CHIMED |
| CHI50462    | China | NA          | Resolved Discharged  | Traditional Chinese Medicine | 20   | CHIMED |
| CHI51028    | China | Non-severe  | Unclear              | Traditional Chinese Medicine | 24   | CHIMED |
| CHI50793    | China | NA          | Resolved Discharged  | Traditional Chinese Medicine | 120  | CHIMED |
| CHI49014    | China | NA          | Unclear              | Traditional Chinese Medicine | 400  | CHIMED |

|             |          |             |                      |                              |       |        |
|-------------|----------|-------------|----------------------|------------------------------|-------|--------|
| CHI49852    | China    | Severe      | Unclear              | Traditional Chinese Medicine | 60    | CHIMED |
| CHI49387    | China    | NA          | Unclear              | Traditional Chinese Medicine | 30    | CHIMED |
| CHI49490    | China    | Severe      | Unclear              | Traditional Chinese Medicine | 80    | CHIMED |
| CHI48886    | China    | Severe      | Hospital             | Traditional Chinese Medicine | 42    | CHIMED |
| IR/46775    | Iran     | NA          | Hospital             | Traditional medicine         | 80    | CHIMED |
| IR/46782    | Iran     | NA          | Hospital             | Traditional medicine         | 68    | CHIMED |
| NCT04251871 | China    | NA          | Unclear              | Traditional Medicine Oral    | 150   | CHIMED |
| CHI48898    | China    | NA          | Unclear              | Traditional Medicine Oral    | 240   | CHIMED |
| CHI48889    | China    | Non-severe  | Unclear              | Traditional Medicine Oral    | 240   | CHIMED |
| CHI50476    | China    | NA          | Resolved Discharged  | Traditional Medicine Oral    | 100   | CHIMED |
| CHI50986    | China    | Non-severe  | Unclear              | Traditional Medicine Oral    | 100   | CHIMED |
| CHI51018    | China    | Non-severe  | Outpatient           | Traditional Medicine Oral    | 128   | CHIMED |
| CHI48773    | China    | None        | Healthy Unexposed    | Traditional Medicine Oral    | 20000 | CHIMED |
| CHI44213    | China    | Mixed       | Hospital             | Traditional Medicine Oral    | 100   | CHIMED |
| CHI49301    | China    | Mixed       | Hospital             | Traditional Medicine Oral    | 120   | CHIMED |
| CHI49138    | China    | Mixed       | Hospital             | Traditional Medicine Oral    | 160   | CHIMED |
| CHI49402    | China    | Mixed       | Outpatient, Hospital | Traditional Medicine Oral    | 300   | CHIMED |
| CHI49502    | China    | NA          | Hospital             | Traditional Medicine Oral    | 110   | CHIMED |
| CHI49422    | China    | NA          | Unclear              | Traditional Medicine Oral    | 600   | CHIMED |
| CHI48861    | China    | NA          | Unclear              | Traditional Medicine Oral    | 100   | CHIMED |
| IR/46678    | Iran     | Unspecified | Hospital             | Traditional Medicine Oral    | 374   | CHIMED |
| IR/46721    | Iran     | Unspecified | Outpatient           | Traditional Medicine Oral    | 100   | CHIMED |
| CHI50126    | China    | NA          | Hospital             | Traditional Medicine Oral    | 300   | CHIMED |
| CHI48775    | China    | NA          | Unclear              | Traditional Medicine Oral    | 300   | CHIMED |
| NCT04279197 | China    | NA          | Unclear              | Traditional Medicine Oral    | 136   | CHIMED |
| CHI52958    | China    | Unclear     | Unclear              | Traditional medicine oral    | 120   | CHIMED |
| CHI52942    | China    | Unclear     | Unclear              | Traditional medicine oral    | 200   | CHIMED |
| CHI49435    | China    | Mixed       | Unclear              | Traditional Medicine Oral    | 40    | CHIMED |
| NCT04347382 | Pakistan | NA          | Hospital             | Traditional Medicine Oral    | 30    | CHIMED |
| CHI49666    | China    | Mixed       | Unclear              | Traditional Medicine Oral    | 72    | CHIMED |
| CHI50662    | China    | NA          | Unclear              | Traditional Medicine Oral    | 50    | CHIMED |
| CHI49753    | China    | Mixed       | Hospital             | Traditional Medicine Oral    | 20    | CHIMED |
| CHI49425    | China    | Mixed       | Hospital             | Traditional Medicine Oral    | 72    | CHIMED |
| CHI49131    | China    | NA          | Hospital             | Traditional Medicine Oral    | 60    | CHIMED |
| IR/46637    | Iran     | Unspecified | Hospital             | Traditional Medicine Oral    | 60    | CHIMED |
| IR/46715    | Iran     | Unspecified | Hospital             | Traditional Medicine Oral    | 60    | CHIMED |



|                          |               |         |                      |                                       |     |                |
|--------------------------|---------------|---------|----------------------|---------------------------------------|-----|----------------|
| IR/47019                 | Iran          | Unclear | Unclear              | Traditional medicine oral             | 80  | CHIMED         |
| CHI50059                 | China         | Severe  | Hospital             | Plasma Product                        | 100 | CONV PLASMA    |
| NCT04355897              | United States | NA      | Hospital             | Convalescent plasma                   | 100 | CONV PLASMA    |
| NCT04362176              | United States | NA      | Hospital             | Convalescent plasma                   | 500 | CONV PLASMA    |
| NCT04359810              | United States | NA      | Hospital             | Convalescent plasma                   | 105 | CONV PLASMA    |
| NCT04357106              | Mexico        | NA      | ICU                  | Convalescent plasma                   | 10  | CONV PLASMA    |
| NCT04347681              | Saudi Arabia  | NA      | Hospital, ICU        | Convalescent plasma                   | 40  | CONV PLASMA    |
| IR/46973                 | Iran          | NA      | Hospital             | Convalescent plasma                   | 60  | CONV PLASMA    |
| IR/47115                 | Iran          | NA      | Hospital             | Convalescent plasma                   | 30  | CONV PLASMA    |
| IR/47266                 | Iran          | NA      | ICU                  | Convalescent plasma                   | 10  | CONV PLASMA    |
| CHI50537                 | China         | Mixed   | Hospital             | Convalescent plasma                   | 50  | CONV PLASMA    |
| IR/46931                 | Iran          | NA      | Hospital             | Convalescent plasma                   | 12  | CONV PLASMA    |
| IR/47212                 | Iran          | NA      | Hospital             | Immunoglobulin                        | 15  | CONV PLASMA    |
| IR/46811                 | Iran          | NA      | Hospital             | Immunoglobulin                        | 50  | CONV PLASMA    |
| IR/47014                 | Iran          | NA      | Hospital             | Immunoglobulin, HCQ, LPV/r, Ribavirin | 100 | CONV PLASMA    |
| NCT04342182              | Netherlands   | Severe  | Hospital             | Plasma                                | 426 | CONV PLASMA    |
| NCT04344535              | United States | Mixed   | Hospital             | Plasma                                | 500 | CONV PLASMA    |
| NCT04345523              | Spain         | NA      | Hospital             | Plasma                                | 278 | CONV PLASMA    |
| IR/46759                 | Iran          | Severe  | Hospital             | Plasma                                | 200 | CONV PLASMA    |
| NCT04364737              | United States | NA      | Hospital             | Plasma                                | 300 | CONV PLASMA    |
| NCT04346446              | India         | Severe  | Hospital             | Plasma                                | 20  | CONV PLASMA    |
| NCT04343755              | United States | Severe  | Hospital             | Plasma                                | 55  | CONV PLASMA    |
| NCT04327349              | Iran          | NA      | Unclear              | Plasma                                | 30  | CONV PLASMA    |
| IR/47058                 | Iran          | NA      | ICU                  | Plasma                                | 32  | CONV PLASMA    |
| <a href="#">IR/47163</a> | Iran          | Severe  | Hospital, ICU        | Plasma                                | 357 | CONV PLASMA    |
| CHI49081                 | China         | Severe  | Hospital             | Plasma Product                        | 200 | CONV PLASMA    |
| NCT04343261              | United States | NA      | Hospital             | Plasma Product                        | 15  | CONV PLASMA    |
| NCT04340050              | United States | NA      | Hospital             | Plasma Product                        | 10  | CONV PLASMA    |
| CHI51072                 | China         | Severe  | ICU                  | Plasma Product                        | 10  | CONV PLASMA    |
| CHI50727                 | China         | Severe  | Hospital             | Plasma Product                        | 30  | CONV PLASMA    |
| CHI49544                 | China         | Mixed   | Outpatient, Hospital | Plasma Product                        | 90  | CONV PLASMA    |
| CHI49861                 | China         | Mixed   | Hospital             | Plasma Product                        | 10  | CONV PLASMA    |
| CHI49533                 | China         | NA      | ICU                  | Plasma Product                        | 20  | CONV PLASMA    |
| NCT04321421              | Italy         | Severe  | ICU                  | Plasma Product                        | 49  | CONV PLASMA    |
| IR/47169                 | Iran          | NA      | Unclear              | Purified protein derivative           | 50  | DIAGNOSTIC     |
| CHI49664                 | China         | NA      | Unclear              | Electrotherapy                        | 40  | ELECTROTHERAPY |

|                                       |                |             |                             |                                   |      |                  |
|---------------------------------------|----------------|-------------|-----------------------------|-----------------------------------|------|------------------|
| IR/47015                              | Iran           | NA          | ICU                         | Hemodialysis                      | 10   | HEMODIALYSIS     |
| <a href="#">IR/47234</a>              | Iran           | NA          | Outpatient                  | Echinacea + Ginger                | 100  | HERBAL           |
| <a href="#">NCT04322344</a>           | Italy          | NA          | Hospital                    | Escin                             | 120  | HERBAL           |
| IR/47018                              | Iran           | NA          | Hospital                    | Foot bath                         | 60   | HYGIENE          |
| NCT04344236                           | United States  | NA          | Unclear                     | Nasal rinses                      | 48   | HYGIENE          |
| <a href="#">NCT04254874</a>           | China          | Mixed       | Unclear                     | Combination Antiviral             | 100  | IFN              |
| NCT04350281                           | China          | Severe      | Hospital, ICU               | IFN, HCQ                          | 80   | IFN              |
| NCT04350671                           | Iran           | Severe      | Hospital                    | IFN, HCQ, LPV/r,                  | 40   | IFN              |
| CHI50470                              | China          | NA          | Unclear                     | Interferon Therapy                | 328  | IFN              |
| EU/2020-001023-14/GB/                 | United Kingdom | NA          | Hospital                    | Interferon Therapy                | 400  | IFN              |
| <a href="#">NCT04331899</a>           | United States  | Non-severe  | Outpatient                  | Interferon Therapy                | 120  | IFN              |
| NCT04320238                           | China          | None        | Healthcare Workers          | Interferon Therapy                | 2944 | IFN              |
| CHI49224                              | China          | Mixed       | Unclear                     | Interferon Therapy                | 100  | IFN              |
| IR/46665                              | Iran           | Unspecified | Hospital                    | Interferon Therapy                | 40   | IFN              |
| NCT04365153                           | United States  | NA          | Hospital                    | Canakinumab                       | 45   | IMMUNE MODULATOR |
| CHI50934                              | China          | NA          | ICU                         | Blood purification                | 20   | IMMUNE MODULATOR |
| <a href="#">NCT04347226</a>           | United States  | NA          | Hospital                    | BMS-986253                        | 138  | IMMUNE MODULATOR |
| <a href="#">NCT04371367</a>           | France         | NA          | ICU                         | Avdoralimab                       | 108  | IMMUNE MODULATOR |
| <a href="#">EU/2020-001736-95/GB/</a> | United Kingdom | Mixed       | Unclear                     | Bemcentinib                       | 825  | IMMUNE MODULATOR |
| NCT04317040                           | United States  | Severe      | Hospital                    | Cd24f                             | 230  | IMMUNE MODULATOR |
| NCT04343989                           | United States  | NA          | ICU                         | Clazakizumab                      | 90   | IMMUNE MODULATOR |
| <a href="#">NCT04345614</a>           | United States  | Severe      | Hospital                    | CM4620                            | 120  | IMMUNE MODULATOR |
| <a href="#">NCT04328480</a>           | Argentina      | Severe      | Hospital                    | Colchicine                        | 2500 | IMMUNE MODULATOR |
| NCT04322682                           | United States  | NA          | Outpatient                  | Colchicine                        | 6000 | IMMUNE MODULATOR |
| NCT04360980                           | Iran           | NA          | Hospital                    | Colchicine                        | 80   | IMMUNE MODULATOR |
| NCT04363437                           | United States  | NA          | Hospital                    | Colchicine                        | 70   | IMMUNE MODULATOR |
| CHI48809                              | China          | NA          | Hospital                    | Cytokine protein injection        | 90   | IMMUNE MODULATOR |
| NCT04361526                           | Spain          | NA          | ICU                         | Cytokine Adsorption               | 40   | IMMUNE MODULATOR |
| <a href="#">CHI49065</a>              | China          | NA          | Outpatient, Hospital        | Cytokine Protein Injection        | 480  | IMMUNE MODULATOR |
| NCT04344080                           | Germany        | NA          | ICU                         | Cytosorb                          | 24   | IMMUNE MODULATOR |
| <a href="#">NCT04346797</a>           | France         | NA          | Hospital, ICU               | Eculizumab                        | 120  | IMMUNE MODULATOR |
| NCT04324021                           | Italy          | Mixed       | Healthcare Workers, Unclear | Emapalumab, Anakinra              | 54   | IMMUNE MODULATOR |
| IR/46837                              | Iran           | Severe      | Hospital, ICU               | Extracorporeal Blood Purification | 10   | IMMUNE MODULATOR |
| CHI49632                              | China          | NA          | ICU                         | Extracorporeal Blood Purification | 60   | IMMUNE MODULATOR |
| IR/46786                              | Iran           | Unspecified | Hospital                    | Fingolimod                        | 40   | IMMUNE MODULATOR |
| NCT04280588                           | China          | Mixed       | Hospital                    | Fingolimod                        | 30   | IMMUNE MODULATOR |

|                                       |               |        |               |                          |     |                  |
|---------------------------------------|---------------|--------|---------------|--------------------------|-----|------------------|
| NCT04333420                           | Netherlands   | Severe | Hospital      | IFX-1                    | 130 | IMMUNE MODULATOR |
| CHI50017                              | China         | Severe | Hospital      | Jakotinib Hydrochloride  | 16  | IMMUNE MODULATOR |
| NCT04351152                           | United States | Mixed  | Hospital      | Lenzilumab               | 238 | IMMUNE MODULATOR |
| NCT04343651                           | United States | NA     | Unclear       | Leronimab                | 75  | IMMUNE MODULATOR |
| NCT04343651                           | United States | NA     | Unclear       | Leronimab                | 75  | IMMUNE MODULATOR |
| NCT04343651                           | United States | NA     | Unclear       | Leronimab                | 75  | IMMUNE MODULATOR |
| <a href="#">NCT04347239</a>           | United States | NA     | Hospital      | Leronimab                | 390 | IMMUNE MODULATOR |
| NCT04342897                           | United States | NA     | Hospital      | LY3127804                | 200 | IMMUNE MODULATOR |
| CHI48907                              | China         | NA     | Unclear       | M1 Macrophage Suppressor | 45  | IMMUNE MODULATOR |
| NCT04334044                           | Mexico        | NA     | Unclear       | Ruxolitinib              | 20  | IMMUNE MODULATOR |
| <a href="#">NCT04338958</a>           | Germany       | Severe | Hospital      | Ruxolitinib              | 200 | IMMUNE MODULATOR |
| NCT04326920                           | Belgium       | Severe | Hospital      | Sargramostim             | 80  | IMMUNE MODULATOR |
| <a href="#">EU/2020-001162-12/FR/</a> | Canada        | Severe | Hospital      | Sarilumab                | 460 | IMMUNE MODULATOR |
| NCT04327388                           | Canada        | Severe | Hospital      | Sarilumab                | 300 | IMMUNE MODULATOR |
| NCT04315298                           | United States | Severe | Hospital      | Sarilumab                | 400 | IMMUNE MODULATOR |
| <a href="#">NCT04359901</a>           | United States | NA     | Hospital      | Sarilumab                | 120 | IMMUNE MODULATOR |
| NCT04357808                           | Spain         | NA     | Hospital      | Sarilumab                | 30  | IMMUNE MODULATOR |
| NCT04349098                           | United States | Severe | Hospital      | Selinexor                | 230 | IMMUNE MODULATOR |
| NCT04329650                           | Spain         | Mixed  | Hospital      | Siltuximab               | 200 | IMMUNE MODULATOR |
| NCT04348695                           | Spain         | Mixed  | Hospital      | Simvastatin, ruxolitinib | 94  | IMMUNE MODULATOR |
| NCT04341675                           | United States | Mixed  | Hospital      | Sirolimus                | 30  | IMMUNE MODULATOR |
| NCT04371640                           | United States | NA     | Hospital      | Sirolimus                | 40  | IMMUNE MODULATOR |
| <a href="#">NCT04322773</a>           | Denmark       | Severe | Hospital      | TCZ                      | 200 | IMMUNE MODULATOR |
| GERDRKS00021238                       | Germany       | NA     | ICU           | TCZ                      | 200 | IMMUNE MODULATOR |
| NCT04335071                           | Switzerland   | Severe | Hospital      | TCZ                      | 100 | IMMUNE MODULATOR |
| CHI49409                              | China         | Mixed  | Hospital      | TCZ                      | 188 | IMMUNE MODULATOR |
| NCT04320615                           | United States | Severe | Hospital      | TCZ                      | 330 | IMMUNE MODULATOR |
| <a href="#">NCT04317092</a>           | Italy         | Severe | Hospital      | TCZ                      | 400 | IMMUNE MODULATOR |
| <a href="#">NCT04361552</a>           | United States | NA     | Hospital      | TCZ                      | 180 | IMMUNE MODULATOR |
| NCT04363853                           | Mexico        | Severe | Hospital, ICU | TCZ                      | 200 | IMMUNE MODULATOR |
| NCT04331795                           | United States | NA     | Hospital      | TCZ                      | 50  | IMMUNE MODULATOR |
| <a href="#">NCT04346355</a>           | Italy         | Mixed  | Hospital      | TCZ                      | 398 | IMMUNE MODULATOR |
| IR/47021                              | Iran          | NA     | ICU           | TCZ                      | 10  | IMMUNE MODULATOR |
| <a href="#">NL8504</a>                | Netherlands   | NA     | Hospital      | TCZ                      | 354 | IMMUNE MODULATOR |
| <a href="#">EU/2020-001770-30/BE/</a> | Belgium       | Severe | Hospital      | TCZ                      | 60  | IMMUNE MODULATOR |
| CHI50693                              | China         | Severe | Hospital      | TCZ , Adalimumab         | 60  | IMMUNE MODULATOR |

|                             |               |            |                           |                                                                      |      |                  |
|-----------------------------|---------------|------------|---------------------------|----------------------------------------------------------------------|------|------------------|
| NCT04335305                 | Spain         | Severe     | Hospital                  | TCZ, pembrolizumab                                                   | 24   | IMMUNE MODULATOR |
| CHI49161                    | China         | Severe     | Hospital                  | Thymosin                                                             | 120  | IMMUNE MODULATOR |
| <a href="#">NCT04341116</a> | United States | Severe     | Hospital                  | TJ003234                                                             | 144  | IMMUNE MODULATOR |
| CHI49215                    | China         | NA         | Hospital                  | vMIP                                                                 | 40   | IMMUNE MODULATOR |
| <a href="#">NCT04350580</a> | France        | Severe     | ICU                       | Immunoglobulin                                                       | 138  | IVIG             |
| IR/47219                    | Iran          | Severe     | Hospital, ICU             | IVIG, LPV/r                                                          | 20   | IVIG             |
| CHI49075                    | China         | Mixed      | Hospital                  | Asc09/Ritonavir                                                      | 160  | LPV              |
| <a href="#">CHI49514</a>    | China         | Mixed      | Outpatient, Hospital, ICU | Carriomycin                                                          | 520  | LPV              |
| CHI49263                    | China         | NA         | Outpatient                | HCQ, LPV/r                                                           | 112  | LPV              |
| <a href="#">NCT04364022</a> | Switzerland   | NA         | Healthy Exposed           | HCQ, LPV/r                                                           | 420  | LPV              |
| <a href="#">CHI48684</a>    | China         | NA         | Hospital                  | LPV/r                                                                | 160  | LPV              |
| <a href="#">CHI48991</a>    | China         | NA         | Outpatient                | LPV/r                                                                | 328  | LPV              |
| NCT04330690                 | Canada        | Mixed      | Hospital                  | LPV/r                                                                | 440  | LPV              |
| NCT04321174                 | Canada        | None       | Healthy Exposed           | LPV/r                                                                | 1220 | LPV              |
| NCT04307693                 | South Korea   | Non-severe | Outpatient                | LPV/r                                                                | 150  | LPV              |
| CHI50057                    | China         | NA         | Unclear                   | LPV/r                                                                | 60   | LPV              |
| NCT04365127                 | United States | NA         | Hospital                  | Progesterone                                                         | 40   | METABOLIC        |
| <a href="#">NCT04365699</a> | United States | NA         | Hospital                  | AT-001                                                               | 500  | METABOLIC        |
| <a href="#">IR/46639</a>    | Iran          | NA         | Hospital                  | Atorvastatin                                                         | 100  | METABOLIC        |
| <a href="#">NCT04350593</a> | United States | Mixed      | Hospital                  | Dapagliflozin                                                        | 900  | METABOLIC        |
| <a href="#">NCT04359329</a> | United States | NA         | Outpatient                | Estradiol                                                            | 110  | METABOLIC        |
| <a href="#">IR/46762</a>    | Iran          | NA         | Outpatient                | Medium-chain triglyceride                                            | 120  | METABOLIC        |
| <a href="#">IR/46690</a>    | Iran          | Mixed      | Hospital                  | Metformin                                                            | 200  | METABOLIC        |
| IR/47334                    | Iran          | NA         | Hospital                  | Sitagliptin                                                          | 84   | METABOLIC        |
| IR/47141                    | Iran          | Unclear    | Outpatient                | Lithium                                                              | 40   | MINERAL          |
| IR/47244                    | Iran          | Unclear    | Hospital                  | Azithromycin + Oseltamivir + LPV/r + Atazanavir + Hydroxychloroquine | 110  | MULTITHERAPY     |
| IR/46538                    | Iran          | NA         | Hospital                  | HCQ , Oseltamivir , LPV/r , IFN                                      | 30   | MULTITHERAPY     |
| <a href="#">NCT04366089</a> | Italy         | NA         | Hospital                  | HCQ, Azithromycin, Oxygen, Probiotic, Dietary supplement             | 152  | MULTITHERAPY     |
| <a href="#">IR/46810</a>    | Iran          | NA         | Hospital                  | HCQ, Corticosteroids, Interferon, Immunoglobulin                     | 105  | MULTITHERAPY     |
| IR/46853                    | Iran          | NA         | Hospital                  | HCQ, Sof+Dac, Lithium, Trifluoprazine + trihexyphenidyl              | 80   | MULTITHERAPY     |
| NCT04331470                 | Iran          | NA         | Unclear                   | Levamisole, LPV/r, HCQ                                               | 30   | MULTITHERAPY     |
| NCT04350684                 | Iran          | Mixed      | Hospital                  | IFN, HCQ, LPV/R, Umifenovir                                          | 40   | MULTITHERAPY     |
| IR/46681                    | Iran          | Mixed      | Hospital                  | TCZ, LPV/r, HCQ, oseltamivir                                         | 40   | MULTITHERAPY     |
| IR/47052                    | Iran          | Unclear    | Unclear                   | LPV/r, Naproxen, HCQ, Oseltamivir                                    | 101  | MULTITHERAPY     |
| IR/46533                    | Iran          | NA         | Unclear                   | Pirfenidone, Chloroquine, LPV/r, Oseltamivir                         | 40   | MULTITHERAPY     |
| NCT04366245                 | Spain         | NA         | Hospital                  | Plasma, HCQ, LPV/r, Azithromycin                                     | 72   | MULTITHERAPY     |

|                                 |               |            |                      |                                    |      |                          |
|---------------------------------|---------------|------------|----------------------|------------------------------------|------|--------------------------|
| <a href="#">NCT04315948</a>     | France        | Severe     | Hospital             | Remdesivir, LPV/r, Interferon, HCQ | 3100 | MULTITHERAPY             |
| CHI49088                        | China         | Severe     | Hospital             | Stem Cell, Ruxolitinib             | 70   | MULTITHERAPY             |
| <a href="#">NCT04326426</a>     | United States | Severe     | Hospital             | Tradipitant                        | 300  | NEURO                    |
| NCT04343963                     | Mexico        | NA         | Hospital             | Pyridostigmine Bromide             | 436  | NEUROGENIC               |
| NCT04368156                     | Spain         | NA         | Hospital             | Vagus nerve stimulation            | 90   | NEUROGENIC               |
| <a href="#">NCT04346693</a>     | Russia        | NA         | Hospital             | Dalargin                           | 320  | OPIOID                   |
| CHI49342                        | China         | Non-severe | Unclear              | Polyinosinic- Polycytidylic Acid   | 40   | POLYNUCLEOTID            |
| <a href="#">NL8491</a>          | Netherlands   | Severe     | Hospital             | Imatinib                           | 386  | PROTEIN KINASE INHIBITOR |
| EU/2020-001236-10/NL/           | Netherlands   | Severe     | Hospital             | Imatinib mesilate                  | 304  | PROTEIN KINASE INHIBITOR |
| <a href="#">CHI49952</a>        | China         | NA         | Outpatient           | Psychological                      | 180  | PSYCHOLOGIC              |
| <a href="#">NCT04342663</a>     | United States | NA         | Outpatient           | Fluvoxamine                        | 152  | PSYCHOLOGIC              |
| IR/47006                        | Iran          | NA         | Hospital             | Trifluoperazine, HCQ               | 70   | PSYCHOLOGIC              |
| NCT04326452                     | United States | Severe     | Hospital             | Bidirectional oxygen               | 15   | PULMONARY                |
| IR/46969                        | Iran          | NA         | Hospital             | Bromhexine                         | 60   | PULMONARY                |
| <a href="#">NCT04355364</a>     | France        | NA         | ICU                  | Dornase Alfa Inhalation Solution   | 100  | PULMONARY                |
| CHI50910                        | China         | Severe     | ICU                  | ECMO                               | 30   | PULMONARY                |
| <a href="#">GERDRKS00021300</a> | Germany       | Severe     | Hospital             | Ecmo                               | 30   | PULMONARY                |
| IR/47173                        | Iran          | Unclear    | Unclear              | Formoterol                         | 50   | PULMONARY                |
| <a href="#">NCT04325906</a>     | United States | Severe     | ICU                  | High nasal flow cannula            | 346  | PULMONARY                |
| EU/2020-001391-15/IE/           | Ireland       | NA         | Hospital             | HUMAN ALPHA1-PROTEINASE INHIBITOR  | 36   | PULMONARY                |
| NCT04332081                     | United States | NA         | Hospital             | Hyperbaric oxygen                  | 40   | PULMONARY                |
| CHI49799                        | China         | NA         | Unclear              | Inhaled solution                   | 60   | PULMONARY                |
| NCT04340414                     | China         | NA         | Hospital             | Low flow ECMO                      | 10   | PULMONARY                |
| NCT04359251                     | China         | NA         | Hospital             | Mechanical Support                 | 20   | PULMONARY                |
| <a href="#">NCT04344730</a>     | France        | NA         | ICU                  | O2 support, Corticosteroids        | 550  | PULMONARY                |
| NCT04359862                     | Spain         | NA         | Hospital, Unclear    | Sedation                           | 50   | PULMONARY                |
| NCT04359862                     | Spain         | NA         | Hospital, Unclear    | Sedation                           | 50   | PULMONARY                |
| NCT04355026                     | Slovenia      | NA         | Hospital             | HCQ, Bromhexine                    | 90   | PULMONARY                |
| <a href="#">NCT04336462</a>     | China         | Severe     | Hospital             | Hydrogen , oxygen                  | 100  | PULMONARY                |
| NCT04344431                     | France        | NA         | Hospital             | Hyperbaric oxygen                  | 100  | PULMONARY                |
| EU/2020-001329-30/AT/           | China         | NA         | ICU                  | Nitric oxide                       | 200  | PULMONARY                |
| NCT04305457                     | United States | Mixed      | Hospital             | Nitric Oxide                       | 240  | PULMONARY                |
| NCT04306393                     | United States | Severe     | ICU                  | Nitric Oxide                       | 200  | PULMONARY                |
| <a href="#">CHI49283</a>        | China         | Mixed      | Hospital             | Oxygen                             | 440  | PULMONARY                |
| <a href="#">NCT04320056</a>     | Canada        | Severe     | Hospital             | Oxygen                             | 216  | PULMONARY                |
| <a href="#">CHI49747</a>        | China         | Mixed      | Outpatient, Hospital | Ozone                              | 180  | PULMONARY                |

|                                      |               |             |                                |                             |       |                           |
|--------------------------------------|---------------|-------------|--------------------------------|-----------------------------|-------|---------------------------|
| CHI49947                             | China         | Mixed       | Outpatient, Hospital           | Ozone                       | 60    | PULMONARY                 |
| CHI49737                             | China         | NA          | Hospital                       | Ozone                       | 60    | PULMONARY                 |
| IR/47149                             | Iran          | NA          | Unclear                        | Ozone Major Autohemotherapy | 80    | PULMONARY                 |
| <a href="#">NCT04359797</a>          | United States | NA          | Hospital                       | Prone positioning           | 300   | PULMONARY                 |
| <a href="#">NCT04358939</a>          | France        | NA          | Hospital                       | Prone positioning           | 248   | PULMONARY                 |
| NCT04344106                          | France        | NA          | Hospital, ICU                  | Prone positioning           | 25    | PULMONARY                 |
| <a href="#">NCT04337541</a>          | Denmark       | Non-severe  | Healthcare Workers, Outpatient | Surgical facial mask        | 6000  | PULMONARY                 |
| NCT04331366                          | United States | Mixed       | Hospital                       | Bidirectional oxygen        | 5     | PULMONARY                 |
| CHI48801                             | China         | Severe      | Hospital, ICU                  | Pirfenidone                 | 292   | PULMONARY FIBROSIS RX     |
| NCT04282902                          | China         | NA          | Hospital                       | Pirfenidone                 | 294   | PULMONARY FIBROSIS RX     |
| CHI51416                             | China         | NA          | Unclear                        | Pirfenidone                 | 40    | PULMONARY FIBROSIS RX     |
| CHI51118                             | China         | NA          | Unclear                        | Pirfenidone                 | 40    | PULMONARY FIBROSIS RX     |
| NCT04366791                          | United States | NA          | Hospital                       | Radiation                   | 10    | RADIATION                 |
| <a href="#">NCT04330300</a>          | Ireland       | NA          | Healthy Unexposed              | Antihypertensives           | 2414  | RAS                       |
| <a href="#">NCT04364893</a>          | Brazil        | NA          | Hospital                       | ARB and ACEi                | 500   | RAS                       |
| <a href="#">NCT04329195</a>          | France        | NA          | Hospital                       | Discontinuation of RAS      | 554   | RAS                       |
| NCT04340557                          | United States | NA          | Hospital                       | Losartan                    | 200   | RAS                       |
| IR/46824                             | Iran          | Unspecified | Hospital                       | Losartan                    | 100   | RAS                       |
| NCT04312009                          | United States | Severe      | Hospital                       | Losartan                    | 200   | RAS                       |
| NCT04311177                          | United States | Non-severe  | Outpatient                     | Losartan                    | 580   | RAS                       |
| NCT04335123                          | United States | Severe      | Hospital, ICU                  | Losartan                    | 50    | RAS                       |
| <a href="#">NCT04355936</a>          | Argentina     | NA          | Unclear                        | Telmisartan                 | 400   | RAS                       |
| <a href="#">NCT04335786</a>          | Netherlands   | Mixed       | Hospital                       | Valsartan                   | 651   | RAS                       |
| CHI50341                             | China         | NA          | Unclear                        | Physical rehabilitation     | 80    | REHABILITATION            |
| <a href="#">NCT04365738</a>          | Turkey        | NA          | Outpatient                     | Respiratory coaching        | 270   | REHABILITATION            |
| <a href="#">CHI50973</a>             | China         | Severe      | Hospital                       | Statin                      | 100   | SERINE PROTEASE INHIBITOR |
| <a href="#">ISRCTNISRCTN83971151</a> | Argentina     | NA          | Hospital                       | LPV/r, IFN, HCQ, remdesivir | 10000 | SOLIDARITY                |
| <a href="#">JPJRCTs031190269</a>     | Japan         | Unspecified | Outpatient                     | Ciclesonide                 | 100   | STEROID                   |
| <a href="#">NCT04348305</a>          | Denmark       | Severe      | Hospital, ICU                  | Corticosteroids             | 1000  | STEROID                   |
| NCT04355637                          | Spain         | NA          | Hospital                       | Corticosteroids             | 300   | STEROID                   |
| NCT04343729                          | Brazil        | NA          | Unclear                        | Corticosteroids             | 420   | STEROID                   |
| <a href="#">NCT04331054</a>          | France        | NA          | Hospital                       | Corticosteroids             | 436   | STEROID                   |
| <a href="#">NCT04327401</a>          | Brazil        | Mixed       | Unclear                        | Corticosteroids             | 290   | STEROID                   |
| <a href="#">CHI50453</a>             | China         | NA          | Outpatient, Hospital           | Corticosteroids             | 200   | STEROID                   |
| <a href="#">NCT04263402</a>          | China         | Severe      | Unclear                        | Corticosteroids             | 100   | STEROID                   |
| <a href="#">NCT04344288</a>          | France        | NA          | Hospital                       | Corticosteroids             | 304   | STEROID                   |

|                             |             |        |                                     |                                      |      |            |
|-----------------------------|-------------|--------|-------------------------------------|--------------------------------------|------|------------|
| IR/46904                    | Iran        | NA     | Hospital                            | Methylprednisolone                   | 40   | STEROID    |
| IR/47088                    | Iran        | NA     | ICU                                 | Methylprednisolone                   | 40   | STEROID    |
| <a href="#">NCT04325061</a> | Spain       | Severe | Hospital                            | Corticosteroids                      | 200  | STEROIDS   |
| IR/46776                    | Iran        | NA     | Hospital                            | Corticosteroids                      | 48   | STEROIDS   |
| NCT04355247                 | Puerto Rico | NA     | Hospital                            | Corticosteroids                      | 20   | STEROIDS   |
| CHI48777                    | China       | Severe | Hospital                            | Corticosteroids                      | 48   | STEROIDS   |
| NCT04244591                 | China       | Severe | ICU                                 | Corticosteroids                      | 80   | STEROIDS   |
| <a href="#">NCT04323592</a> | Italy       | Severe | Hospital                            | Corticosteroids                      | 104  | STEROIDS   |
| NCT04341038                 | Spain       | Severe | ICU                                 | Corticosteroids, tacrolimus          | 84   | STEROIDS   |
| CHI49534                    | China       | Severe | Hospital                            | Alpha Lipoic Acid                    | 68   | SUPPLEMENT |
| IR/47139                    | Iran        | NA     | Outpatient                          | Asafoetida                           | 60   | SUPPLEMENT |
| IR/46868                    | Iran        | NA     | Outpatient                          | Berberine                            | 40   | SUPPLEMENT |
| IR/47193                    | Iran        | NA     | Hospital                            | Black myrobalan + Mastic + Sugarcane | 10   | SUPPLEMENT |
| <a href="#">IR/46875</a>    | Iran        | NA     | Hospital                            | Calcifediol                          | 260  | SUPPLEMENT |
| <a href="#">IR/47010</a>    | Iran        | NA     | Healthy Exposed, Healthcare Workers | Calcifediol                          | 540  | SUPPLEMENT |
| IR/46978                    | Iran        | NA     | Outpatient                          | Crocetin                             | 40   | SUPPLEMENT |
| <a href="#">IR/46554</a>    | Iran        | NA     | Hospital                            | Crostop/Croguard                     | 150  | SUPPLEMENT |
| <a href="#">IR/46879</a>    | Iran        | NA     | Hospital                            | Herbal                               | 110  | SUPPLEMENT |
| <a href="#">IR/46913</a>    | Iran        | NA     | Unclear                             | Herbal                               | 130  | SUPPLEMENT |
| IR/46828                    | Iran        | NA     | Hospital                            | Herbal                               | 60   | SUPPLEMENT |
| IR/46850                    | Iran        | NA     | Unclear                             | Herbal                               | 60   | SUPPLEMENT |
| IR/46907                    | Iran        | NA     | Unclear                             | Herbal                               | 60   | SUPPLEMENT |
| IR/46958                    | Iran        | NA     | Outpatient                          | Herbal                               | 40   | SUPPLEMENT |
| IR/46961                    | Iran        | NA     | Hospital                            | Herbal                               | 15   | SUPPLEMENT |
| IR/47016                    | Iran        | NA     | Hospital                            | Herbal                               | 60   | SUPPLEMENT |
| IR/46733                    | Iran        | NA     | Hospital                            | Herbal medicine                      | 64   | SUPPLEMENT |
| IR/46893                    | Iran        | NA     | Outpatient                          | Licorice                             | 40   | SUPPLEMENT |
| <a href="#">CHI50421</a>    | China       | Mixed  | Outpatient, Hospital                | Lipoic Acid                          | 394  | SUPPLEMENT |
| IR/46903                    | Iran        | NA     | Hospital                            | Marshmallow + Licorice               | 60   | SUPPLEMENT |
| IR/46963                    | Iran        | NA     | ICU                                 | Melatonin, Vitamin C                 | 20   | SUPPLEMENT |
| NCT04323345                 | Egypt       | NA     | Unclear                             | Nutritional Support                  | 1000 | SUPPLEMENT |
| <a href="#">NCT04323514</a> | Italy       | Severe | Hospital                            | Nutritional Support                  | 500  | SUPPLEMENT |
| IR/47251                    | Iran        | NA     | Hospital                            | Pomegranate syrup                    | 66   | SUPPLEMENT |
| <a href="#">NCT04366180</a> | Spain       | NA     | Healthcare Workers                  | Probiotic                            | 314  | SUPPLEMENT |
| <a href="#">CHI49321</a>    | China       | Mixed  | Outpatient, Hospital                | Probiotics                           | 300  | SUPPLEMENT |
| CHI49530                    | China       | Severe | Hospital                            | Regulating Intestinal Flora Agent    | 60   | SUPPLEMENT |

|                                    |                |             |                                                |                 |      |            |
|------------------------------------|----------------|-------------|------------------------------------------------|-----------------|------|------------|
| <a href="#">IR/47318</a>           | Iran           | NA          | Hospital                                       | Syrup zofa      | 100  | SUPPLEMENT |
| <a href="#">IR/46974</a>           | Iran           | NA          | Unclear                                        | Vitamin A       | 140  | SUPPLEMENT |
| <a href="#">NCT04264533</a>        | China          | Severe      | ICU                                            | Vitamin C       | 140  | SUPPLEMENT |
| NCT04357782                        | United States  | NA          | Hospital                                       | Vitamin C       | 20   | SUPPLEMENT |
| IR/46804                           | Iran           | NA          | Hospital                                       | Vitamin C       | 60   | SUPPLEMENT |
| <a href="#">NCT04342728</a>        | United States  | Non-severe  | Outpatient                                     | Vitamin C, Zinc | 520  | SUPPLEMENT |
| <a href="#">NCT04344041</a>        | France         | NA          | Unclear                                        | Vitamin D       | 260  | SUPPLEMENT |
| IR/46751                           | Iran           | Unspecified | Hospital                                       | Vitamine C      | 40   | SUPPLEMENT |
| IR/46838                           | Iran           | NA          | ICU                                            | Vitamins        | 60   | SUPPLEMENT |
| NCT04328441                        | Netherlands    | NA          | Healthcare Workers                             | BCG Vaccine     | 1500 | VACCINE    |
| NCT04327206                        | Australia      | NA          | Healthcare Workers                             | BCG Vaccine     | 4170 | VACCINE    |
| NCT04352608                        | China          | NA          | Healthy Unexposed                              | Vaccine         | 744  | VACCINE    |
| EU/2020-001072-15/GB/              | United Kingdom | NA          | Healthy Unexposed                              | Vaccine         | 510  | VACCINE    |
| NCT04283461                        | United States  | None        | Healthy Unexposed                              | Vaccine         | 105  | VACCINE    |
| NCT04324606                        | United Kingdom | None        | Healthy Unexposed                              | Vaccine         | 1112 | VACCINE    |
| NCT04276896                        | China          | NA          | Hospital                                       | Vaccine         | 100  | VACCINE    |
| NCT04299724                        | China          | NA          | Healthy Unexposed, Healthy Exposed, Outpatient | Vaccine         | 100  | VACCINE    |
| <a href="#">CURPCEC00000306-En</a> | Cuba           | NA          | Healthy Exposed                                | Vaccine         | 80   | VACCINE    |
| NCT04336410                        | United States  | Non-severe  | Healthy Unexposed                              | Vaccine         | 40   | VACCINE    |
| NCT04336410                        | United States  | Non-severe  | Healthy Unexposed                              | Vaccine         | 40   | VACCINE    |
